# Supplementary material for: A new high-content screening assay of the entire hepatitis B virus life cycle identifies novel antivirals
Source: PubMed Central journal article supplement — JHEP Rep. 2021 Apr 30;3(4):100296. doi: 10.1016/j.jhepr.2021.100296 (PMC8243515; doi:10.1016/j.jhepr.2021.100296), 2021-04-30
Supplement: mmc2.pdf [file mmc2.pdf]

## JHEP Reports

### CTAT methods

Tables for a “Complete, Transparent, Accurate and Timely account” (CTAT) are now mandatory for all revised submissions. The aim is to enhance the reproducibility of methods.

- Only include the parts relevant to your study
- Refer to the CTAT in the main text as ‘Supplementary CTAT Table’
- Do not add subheadings
- Add as many rows as needed to include all information
- Only include one item per row

If the CTAT form is not relevant to your study, please outline the reasons why:

|  |
|--|
|  |
|--|

#### 1.1 Antibodies

| Name                                                 | Citation                                          | Supplier    | Cat no.       | Clone no. |
|------------------------------------------------------|---------------------------------------------------|-------------|---------------|-----------|
| Anti-HBV core antigen antibody (rabbit polyclonal)   | Rodriguez et al. (2001) J. Virol. 75: 10421-10430 | Dako        | B0586         | N/A       |
| Anti-HBV surface antigen antibody (mouse monoclonal) | Jing Jin et al. (2016) JPTM. 50:181-189           | Cell Marque | 217M-26 (ASR) | N/A       |

#### 1.2 Cell lines

| Name            | Citation                                                      | Supplier                                    | Cat no. | Passage no. | Authentication test method |
|-----------------|---------------------------------------------------------------|---------------------------------------------|---------|-------------|----------------------------|
| HepAD38         | Ladner et al. (1997) Antimicrob Agents hemother. 41:1715-1720 | Dr. Christoph Seeger, Fox Chase Center, USA | /       | p35         | None                       |
| HepG2-NTCP sec+ | -                                                             | Dr. Marc Windisch, Institut Pasteur, Korea  | -       | p27         | Confirm                    |

#### 1.3 Organisms : N/A

## 1.4 Sequence based reagents

| Name    | Sequence                                                                                                                                       | Supplier          |
|---------|------------------------------------------------------------------------------------------------------------------------------------------------|-------------------|
| HBV DNA | <b>Forward:</b><br>ACTCACCAACCTCCTGTCCT<br><b>Reverse:</b><br>GACAAACGGGCAACATACCT<br><b>Probe:</b> FAM-<br>TATCGCTGGATGTGTCTGCGGCGT-<br>TAMRA | Life Technologies |

## 1.5 Biological samples

| Description   | Source                                     | Identifier   |
|---------------|--------------------------------------------|--------------|
| Patient serum | Catholic University Liver Research Center, | HBV patients |

## 1.6 Deposited data

| Name of repository | Identifier | Link |
|--------------------|------------|------|
|                    |            |      |

## 1.7 Software

| Software name                      | Manufacturer      | Version |
|------------------------------------|-------------------|---------|
| GraphPad Prism                     | GraphPad Software | 6       |
| Columbus                           | PerkinElmer       | 2.0     |
| CS Analyser 4                      | ATTO Corp.        | 2.1.0   |
| QuantStudio Real-Time PCR software | Life Technology   | N/A     |

## 1.8 Other (e.g. drugs, proteins, vectors etc.)

|                                           |                                                                                                                                                                                   |
|-------------------------------------------|-----------------------------------------------------------------------------------------------------------------------------------------------------------------------------------|
| Lamivudine                                | Selleckchem                                                                                                                                                                       |
| Tenofovir Disoproxil Fumarate             | Selleckchem                                                                                                                                                                       |
| Bay41-4109                                | MedChemExpress                                                                                                                                                                    |
| Hepabulin                                 | SK-Plasma                                                                                                                                                                         |
| MyrB                                      | PSL GmbH                                                                                                                                                                          |
| HBV Gt.D 2-49myr_Alexa 633                | BioSynthesis                                                                                                                                                                      |
| NTCP substrate                            | GenoMembrane                                                                                                                                                                      |
| Chemical library<br>2,102 small molecules | Tocris Bioscience (Bristol, UK), Selleck Chemicals (TX, USA), LOPAC (Sigma-Aldrich, MO, USA), Prestwick Chemical (Illkirch, France), and MicroSource Discovery Systems (CT, USA). |

## 1.9 Please provide the details of the corresponding methods author for the manuscript:

|                                                                                                                                                                                                       |
|-------------------------------------------------------------------------------------------------------------------------------------------------------------------------------------------------------|
| Marc P. Windisch, PhD<br>Applied Molecular Virology Laboratory<br>Discovery Biology Department<br>Institut Pasteur Korea<br>16, Daewangpangyo-ro 712 beon-gil<br>Bundang-gu, Seongnam-si, Gyeonggi-do |
|-------------------------------------------------------------------------------------------------------------------------------------------------------------------------------------------------------|

**463-400 South Korea**  
**Phone: +82-31-8018-8181**  
**Fax: +82-31-8018-8014**  
**Email: [marc.windisch@ip-korea.org](mailto:marc.windisch@ip-korea.org)**

**2.0 Please confirm for randomised controlled trials all versions of the clinical protocol are included in the submission. These will be published online as supplementary information.**
